# Supplementary material for: Minimizing ICU Neurological Dysfunction with Dexmedetomidine-induced Sleep (MINDDS): protocol for a randomised, double-blind, parallel-arm, placebo-controlled trial
Source: PubMed Central journal article supplement — BMJ Open. 2018 Apr 20;8(4):e020316. doi: 10.1136/bmjopen-2017-020316 (PMC5914725; doi:10.1136/bmjopen-2017-020316), 2018-04-20
Supplement: bmjopen-2017-020316supp001.pdf [file bmjopen-2017-020316supp001.pdf]

## STUDY TEAM ROSTER

### Principal

#### Investigator:

**Oluwaseun Johnson-Akeju, M.D., M.M.Sc.**

Massachusetts General Hospital  
Department of Anesthesiology  
55 Fruit Street  
Gray/Jackson 444  
Boston, MA 02114  
United States  
617-724-2000  
oluwaseun.akeju@mgh.harvard.edu

#### Co-Investigators:

**Federico Bilotta, MD**

University of Rome 'La Sapienza'  
Department of Anesthesiology  
Piazzale Aldo Moro,  
5, 00185 Roma, Italy  
339 33 708 22  
bilotta@tiscali.it

**Emery N. Brown, M.D., Ph.D.**

Massachusetts General Hospital  
Department of Anesthesiology  
55 Fruit Street  
Gray/Jackson 444  
Boston, MA 02114  
United States  
617-324-1880  
enb@neurostat.mit.edu

**Gaston Cudemus, M.D.**

Massachusetts General Hospital  
Department of Anesthesiology  
55 Fruit Street  
Gray/Jackson 444  
Boston, MA 02114  
United States  
617-726-9149  
gcudemus@mgh.harvard.edu

**David D'Alessandro, M.D.**

Massachusetts General Hospital  
Department of Surgery

Division of Cardiac Surgery  
Cox Building 644  
Boston, MA 02114  
United States  
617-726-8841  
dadalessandro@mgh.harvard.edu

**Hao Deng, M.D., M.P.H.**

Massachusetts General Hospital  
Department of Anesthesiology  
55 Fruit Street  
Gray/Jackson 444  
Boston, MA 02114  
United States  
617-643-6757  
hdeng1@mgh.harvard.edu

**Alan DiBiasio, B.S. Pharm**

Massachusetts General Hospital  
Department of Pharmacy,  
55 Fruit St  
Gray/Bigelow 005  
Boston, MA 02114  
United States  
617-724-1270  
adibiasio@partners.org

**Jacob A Gitlin, B.S.**

Massachusetts General Hospital  
Department of Anesthesiology  
55 Fruit Street  
Gray/Jackson 444  
Boston, MA 02114  
United States  
617-724-2000  
jgitlin1@partners.org

**Eunice Y Hahm, B.S**

Massachusetts General Hospital  
Department of Anesthesiology  
55 Fruit Street  
Gray/Jackson 444  
Boston, MA 02114  
United States  
617-724-2000  
ehahm@mgh.harvard.edu

**Lauren E. Hobbs, M.S.**

Massachusetts General Hospital  
Department of Anesthesiology  
55 Fruit Street  
Gray/Jackson 444  
Boston, MA 02114  
United States  
617-724-9857  
[lehobbs@mgh.harvard.edu](mailto:lehobbs@mgh.harvard.edu)

**Timothy Houle, Ph.D.**

Massachusetts General Hospital  
Department of Anesthesiology  
55 Fruit Street  
Gray/Jackson 444  
Boston, MA 02114  
United States  
617-724-2111  
[thoule1@mgh.harvard.edu](mailto:thoule1@mgh.harvard.edu)

**Reine Ibala, B.S.**

Massachusetts General Hospital  
Department of Anesthesiology  
55 Fruit Street  
Gray/Jackson 444  
Boston, MA 02114  
United States  
617-724-2000  
[ribala@mgh.harvard.edu](mailto:ribala@mgh.harvard.edu)

**Marco L. Loggia, Ph.D.**

Massachusetts General Hospital  
Department of Radiology  
149 13th Street  
CNY - Building 149  
Charlestown, MA 02129  
United States  
617-643-7267  
[marco.loggia@mgh.harvard.edu](mailto:marco.loggia@mgh.harvard.edu)

**Jason Qu, M.D.**

Massachusetts General Hospital  
Department of Anesthesiology  
55 Fruit Street  
Gray/Jackson 444  
Boston, MA 02114  
United States  
617-643-4401  
[jqu@partners.org](mailto:jqu@partners.org)

**Kara J. Pavone, B.S., B.S.N., R.N.**

Massachusetts General Hospital  
Department of Anesthesiology  
55 Fruit Street  
Gray/Jackson 444  
Boston, MA 02114  
United States  
617-724-9857  
kpavone@mgh.harvard.edu

**Shahzad Shaefi, M.D., MPH**

Beth Israel Deaconess Medical Center  
Department of Anesthesia and Critical Care  
330 Brookline Avenue,  
Feldberg 407  
Boston, MA 02215  
United States  
617-667-3112  
sshafefi@bidmc.harvard.edu

**Kenneth Shelton, M.D.**

Massachusetts General Hospital  
Department of Anesthesiology  
55 Fruit Street  
Gray/Jackson 444  
Boston, MA 02114  
United States  
617-726-0917  
kshelton2@partners.org

**George Tolis, M.D.**

Massachusetts General Hospital  
Department of Surgery  
Division of Cardiac Surgery  
55 Fruit Street  
Cox Building 654  
Boston, MA 02114  
United States  
617-643-9280  
gtolis@partners.org

**M. Brandon Westover, MD, PhD**

Massachusetts General Hospital  
Department of Neurology  
55 Fruit Street  
Boston, MA 02114  
United States

617-726-3311  
mwestover@mgh.harvard.edu

|                                                      |                                                                                                                                                                                                                                                              |
|------------------------------------------------------|--------------------------------------------------------------------------------------------------------------------------------------------------------------------------------------------------------------------------------------------------------------|
| <b>Primary Registry and Trial Identifying Number</b> | <b>ClinicalTrials: NCT02856594</b>                                                                                                                                                                                                                           |
| <b>Date of Registration</b>                          | July 29 2016                                                                                                                                                                                                                                                 |
| <b>Secondary Identifying Numbers</b>                 | IRB ID#: 2016 P000742                                                                                                                                                                                                                                        |
| <b>Source(s) of Monetary Support</b>                 | National Institute on Aging Grant (Award Reference Number R01 AG053582-01)                                                                                                                                                                                   |
| <b>Primary Sponsor</b>                               | Department of Anesthesiology, Critical care and Pain Medicine Massachusetts General Hospital<br>Boston, MA 02114                                                                                                                                             |
| <b>Contact name</b>                                  | Oluwaseun Akeju, M.D., M.M.Sc<br>oluwaseun.akeju@mgh.harvard.edu<br>617-724-2000<br>Department of Anesthesiology, Critical care and Pain Medicine Massachusetts General Hospital<br>55 Fruit Street<br>Gray/Jackson 444<br>Boston, MA 02114<br>United States |
| <b>Contact for Scientific Queries</b>                | Oluwaseun Akeju, M.D., M.M.Sc<br>oluwaseun.akeju@mgh.harvard.edu<br>617-724-2000<br>Department of Anesthesiology<br>Massachusetts General Hospital<br>55 Fruit Street<br>Gray/Jackson 444<br>Boston, MA 02114<br>United States                               |
| <b>Public Title</b>                                  | Protocol for the Minimizing ICU Neurological Dysfunction with Dexmedetomidine-induced Sleep (MINDDS) Trial                                                                                                                                                   |
| <b>Scientific Title</b>                              | Protocol for the Minimizing ICU Neurological Dysfunction with Dexmedetomidine-induced Sleep (MINDDS) Trial: a Randomized, Double blind, Parallel-arm, Placebo-controlled Clinical Trial                                                                      |

|                                                             |                                                                                                                                                                                                                                                                                                                                                                                                                                                                                                                                                                                                                                                                                                                                                                                                                                                                                                                                                                                                                                                                                                                                                                                                                                                                                                                                                                                                                                                                                                                                                                                                                                                                                          |
|-------------------------------------------------------------|------------------------------------------------------------------------------------------------------------------------------------------------------------------------------------------------------------------------------------------------------------------------------------------------------------------------------------------------------------------------------------------------------------------------------------------------------------------------------------------------------------------------------------------------------------------------------------------------------------------------------------------------------------------------------------------------------------------------------------------------------------------------------------------------------------------------------------------------------------------------------------------------------------------------------------------------------------------------------------------------------------------------------------------------------------------------------------------------------------------------------------------------------------------------------------------------------------------------------------------------------------------------------------------------------------------------------------------------------------------------------------------------------------------------------------------------------------------------------------------------------------------------------------------------------------------------------------------------------------------------------------------------------------------------------------------|
| <b>Countries of Recruitment</b>                             | United States                                                                                                                                                                                                                                                                                                                                                                                                                                                                                                                                                                                                                                                                                                                                                                                                                                                                                                                                                                                                                                                                                                                                                                                                                                                                                                                                                                                                                                                                                                                                                                                                                                                                            |
| <b>Health Condition(s) or Problem(s) Studied</b>            | Postoperative delirium, predictors of delirium                                                                                                                                                                                                                                                                                                                                                                                                                                                                                                                                                                                                                                                                                                                                                                                                                                                                                                                                                                                                                                                                                                                                                                                                                                                                                                                                                                                                                                                                                                                                                                                                                                           |
| <b>Intervention(s)</b>                                      | <p>Trial arm 1: Dexmedetomidine-induced Sleep Group (primary intervention)</p> <p>Post cardiac surgical patients admitted to the cardiac surgical intensive care unit (CSICU) and extubated at least 30 minutes prior to 8:30 PM would receive a sleep induction dose of dexmedetomidine (1mcg/kg over 40 minutes; maximum administered dose of 80mcg at any one instance) at 9 PM every night throughout their CSICU stay. Trial patients admitted to the CSICU and extubated after 8:30 PM, but before 2 AM, would receive a sleep induction dose of dexmedetomidine within 30 minutes of extubation. However, throughout the rest of the CSICU stay the dexmedetomidine administration time will be targeted for 9 PM. Trial patients admitted to the CSICU and remain intubated past 2 AM will begin trial procedures the following day, assuming they are extubated within 12 hours of admission to the CSICU.</p> <p>Trial arm 2: Placebo Control Group.</p> <p>Post cardiac surgical patients admitted to the CSICU and extubated at least 30 minutes prior to 8:30 PM would receive placebo (intravenous normal saline over 40 minutes) at 9 PM every night throughout their CSICU stay. Trial patients admitted to the CSICU and extubated after 8:30 PM, but before 2 AM, would receive the placebo infusion of normal saline within 30 minutes of extubation. However, throughout the rest of the CSICU stay the placebo administration time will be targeted for 9 PM. Trial patients who are admitted to the CSICU and remain intubated past 2 AM will begin trial procedures the following day, assuming they are extubated within 12 hours of admission to the CSICU.</p> |
| <b>Key Inclusion, Exclusion and Objective Drop Criteria</b> | <p>Inclusion Criteria</p> <ol style="list-style-type: none"> <li>1. Age <math>\geq</math> 60</li> <li>2. Scheduled for a cardiac surgical procedure with planned postoperative admission to the CSICU for <math>\geq</math> 24 hours</li> <li>3. Scheduled same day surgical admission</li> </ol>                                                                                                                                                                                                                                                                                                                                                                                                                                                                                                                                                                                                                                                                                                                                                                                                                                                                                                                                                                                                                                                                                                                                                                                                                                                                                                                                                                                        |

#### Exclusion Criteria

1. Blindness, deafness or the inability to speak English
2. Greater than 2 days of ICU admission in the month preceding the current surgical procedure
3. Renal and liver failure requiring dialysis or Child-Pugh score > 5
4. Follow-up difficulties (i.e. active substance abuse, psychotic disorder, homelessness)
5. Previous cardiac surgery within 1 year of surgical procedure
6. Allergy to dexmedetomidine
7. Chronic therapy with benzodiazepines and/or antipsychotics
8. Severe neurological deficit due to structural or anoxic brain damage
9. Surgical procedures requiring total circulatory arrest

#### Objective Drop Criteria

1. Scheduled for a second surgical procedure during hospital stay
2. Post-operative intubation > 12 hours

#### **Trial Type**

Interventional

Allocation: Randomized

Intervention model: Parallel assignment

Blinding: Clinicians blinded to intervention, subject blinded to intervention, primary outcome assessor blinded to intervention

Assignment: Parallel

Primary purpose: Prevention

#### **Date of First Enrollment**

March, 2017

#### **Target Sample Size**

Recruiting until 370 patients receive the study intervention on Post Operative Day 0.

#### **Recruitment Status**

Enrolling

#### **Primary Outcome(s)**

Outcome name: Incidence of postoperative delirium

Method of measurement: The Long Confusion

**Key Secondary Outcomes**

Assessment Method

Time points of interest: Postoperative day 1

Outcome name: ICU and hospital delirium/coma-free days

Method of measurement: Delirium assessment with: The Long Confusion Assessment Method

Time points of interest: Up until postoperative day 3 if no delirium. Up until postoperative day 5 if delirium exhibited but resolved. Up until postoperative day 7 or discharge if delirium unresolved by postoperative day 5.

Outcome name: Severity of Delirium

Method of measurement: The Long Confusion Assessment Method

Time points of interest: Up until postoperative day 3 if no delirium. Up until postoperative day 5 if delirium exhibited but resolved. Up until postoperative day 7 or discharge if delirium unresolved by postoperative day 5.

Outcome name: Date of Hospital Discharge / Length of Hospital Stay

Method of measurement: Medical record review

Time points of interest: Up until hospital discharge

Outcome name: 30-day, 90-day, and 180-day mortality

Method of measurement: Medical record review

Time points of interest: 30 days, 90 days and 180 days postoperatively

Outcome name: Postoperative cognitive status

Method of measurement: Abbreviated Montreal Cognitive Assessment, 3D-CAM and PROMIS-29 applied cognition abilities questionnaire

Time points of interest: 30 days, 90 days and 180

days postoperatively

Outcome name: Postoperative health related quality of life

Method of measurement: PROMIS-29 physical function, global health, pain interference questionnaires, and sleep questionnaire

Time points of interest: 30 days, 90 days and 180 days postoperatively

## **ORGANIZATIONAL STRUCTURE AND RESPONSIBILITIES**

### **Principal Investigator:**

Oluwaseun Akeju, M.D., M.M.Sc.

Responsibilities include: design and conduct of the MINDDS trial, preparation of protocol and revisions, organization of steering committee meetings, and publication of trial reports.

### **Steering Committee:**

|                                |                              |                                    |
|--------------------------------|------------------------------|------------------------------------|
| Oluwaseun Akeju, M.D.,<br>MMSc | Gaston Cudemus, M.D.         | Ken Shelton, M.D.                  |
| Federico Bilotta, MD           | Marco L Loggia, Ph.D.        | Brandon M Westover, M.D.,<br>Ph.D. |
| Alan DiBiasio, Pharm.D         | Kara Pavone, B.SN., R.N      |                                    |
| Tim Houle, Ph.D                | Jason Qu, M.D.               |                                    |
|                                | Shahzad Shaefi, M.D.,<br>MPH |                                    |

Responsibilities include: agreement of final protocol, reviewing progress of trial and if necessary, conducting changes to the protocol, coordinating with principal investigator, and communicating with trial management committee.

### **Trial Management Committee:**

Oluwaseun Akeju, M.D, M.M.Sc.  
Tim Houle, Ph.D.  
Lauren E Hobbs, M.S.  
Reine Ibala, B.S.  
Eunice Hahm, B.S.  
Jacob Gitlin, B.S.  
Kara Pavone, B.S.N, R.N.  
Jason Qu, M.D.  
Ken Shelton, M.D.

Responsibilities include: trial planning, organization of steering committee meetings, reporting SAEs (Serious Adverse Events) to Partners Healthcare IRB (Institutional Review Board), maintaining REDCap electronic database, reporting to steering committee, conducting data verification, recruitment, randomization, and follow-up of trial participants

### **Data Management Committee:**

Hao Deng, M.D., M.P.H.  
Tim Houle, Ph.D.

Responsibilities include: statistical design of trial, data verification.

### **Data Adjudication Committee:**

Oluwaseun Akeju, M.D., M.M.Sc.  
Shahzad Shaefi, M.D., MPH

Brandon M Westover, M.D., Ph.D.

**Responsibilities include: regularly reviewing delirium assessments, contacting trial management committee, retraining researchers if necessary.**

**Data and Safety Monitoring Committee:**

Wie Chao, M.D., Ph.D. - University of Maryland School of Medicine

**Jesse Ehrenfeld, M.D.,M.P.H. -Vanderbilt University Medical Center**

Michael Gropper, M.D., Ph.D. - University of California San Francisco

Keith A. Jones, M.D. - The University of Alabama at Birmingham

Responsibilities include: reviewing and evaluating the trial data to ensure participant safety, trial conduct, progress, and efficacy, and making recommendations regarding the continuation, modification, and termination of the trial.
